# Supplementary material for: Transition metal/nitrogen dual-doped mesoporous graphene-like carbon nanosheets for the oxygen reduction and evolution reactions
Source: Royal Society of Chemistry journal article supplement (doi:10.1039/c6nr03247h), 2016-01-01
Supplement: c6nr03247h1.pdf [file c6nr03247h1.pdf]

## **Electronic Supporting Information**

### **Transition Metal/Nitrogen dual-doped Mesoporous Graphene-like Carbon**

#### **Nanosheets for Oxygen Reduction and Evolution reactions**

Xiaobo Liu, Ibrahim Saana Amiinu, Shaojun Liu, Kun Cheng, Shichun Mu\*

State Key Laboratory of Advanced Technology for Materials Synthesis and Processing, Wuhan

University of Technology, Wuhan, 430070, PR China

E-mail: [msc@whut.edu.cn](mailto:msc@whut.edu.cn)

## List of figure captions

**Scheme S1** Shape evolution from NC (a) to Co@N-PC (b), Co@N-PGCS (c). Briefly, NC displays amorphous carbon structure, after addition of cobalt salts, surface roughness increases, and Co species can convert the amorphous carbon to more regular graphitic carbon, some Co species embedded ultra-thick graphitic carbon layer are difficult removed completely (Co@N-PC). For Co@N-PGCS, the pyrolysis production (MgO) of Mg(OH)<sub>2</sub> at high temperature can serve as template, contribute to the formation of mesoporous structure with thin shell.

**Figure S1** (a) FESEM image of NC; (b) HRTEM images of NC which exhibits an amorphous characteristic; (c) and (d) TEM images of Co@N-PGCS at different magnification scale and district.

**Figure S2** (a) TEM images of Co@N-PGCS with highly porous structure; (b) TEM image of Co@N-PC which the Co<sub>3</sub>O<sub>4</sub> encapsulated in ultra-thick graphitic carbon layer.

**Figure S3** Simultaneous thermal analysis of Co@N-PGCS.

**Figure S4** (a) XPS survey of NC through direct thermal decomposition of chitosan; (b) C1s; (c) N1s. (d) XPS survey of Co@N-PC; (e) C1s; (f) N1s; (g) Co2p.

**Figure S5** The current vs. time (*i* - *t*) chronoamperometric responses of Co@N-PGCS and Pt/C: (a) Durability, inset: the ratio of the current loss (*J*/*J*<sub>0</sub>), (b) Methanol tolerance (1 M), inset: the ratio of the current loss (*J*/*J*<sub>0</sub>), and (c) CO tolerance (≈10%), inset: the ratio of the current loss (*J*/*J*<sub>0</sub>). (d) and (e) LSV curves of Co@N-PGCS and Pt/C separately, the stability of catalysts was symbolized by Δ*E*<sub>1/2</sub> before and after the *i* - *t* test. Data (a, b, c, d and e) were recorded in 0.1 M KOH solution in O<sub>2</sub>-saturated at a constant potential at -0.30 V and a rotation speed of 1600 rpm, (f) Comparison of ORR performance for Co@N-PGCS and commercial Pt/C in O<sub>2</sub>-saturated 0.1 M HClO<sub>4</sub> solution with a rotation speed of 1600 rpm.

**Figure S6** (a) Survey statistics of onset potential and half-wave potential for NC, Co@N-PC, Co@N-PGCS, and NC; (b) Electron transfer number of Co@N-PGCS.

For ORR, the average number of electrons transferred is estimated using the Koutecky-Levich equation. [11]

$$\frac{1}{j} = \frac{1}{j_k} + \frac{1}{j_L} = \frac{1}{B\omega^{1/2}} + \frac{1}{j_k}$$
$$B = 0.62nFC_0(D_0)^{2/3}\nu^{-1/6}$$

where *n* is the electron transfer number, *j* indicates measured current density, *j<sub>k</sub>* is the kinetic current density, *j<sub>L</sub>* is the diffusion-limited current density,  $\omega$  is the speed of electrode rotation, *F* denotes the Faraday constant (*F* = 96485 C mol<sup>-1</sup>), *C*<sub>0</sub> is the bulk oxygen concentration (*C*<sub>0</sub> = 1.2 × 10<sup>-3</sup> mol L<sup>-1</sup>), *D*<sub>0</sub> is the diffusion coefficient of oxygen (*D*<sub>0</sub> = 1.9 × 10<sup>-5</sup> cm<sup>2</sup> s<sup>-1</sup> in 0.1M KOH) and  $\nu$  is the kinematic viscosity of the solution ( $\nu$  = 1.0 × 10<sup>-2</sup> cm<sup>2</sup> s<sup>-1</sup>).

**Figure S7** Nyquist plots of NC, Co@N-PC, and Co@N-PGCS modeled by equivalent electrical circuit (inset).

**Figure S8** (a) *i*-*t* curves of Co@N-PGCS at a constant potential of 0.65V. Inset pictures are bubble size at different time. (b) *i*-*t* curves of Co@N-PGCS at a rotation speed of 1600rpm.

**Table S1** Elemental contents of samples by Element Mapping and XPS surface scan.

**Scheme S1**

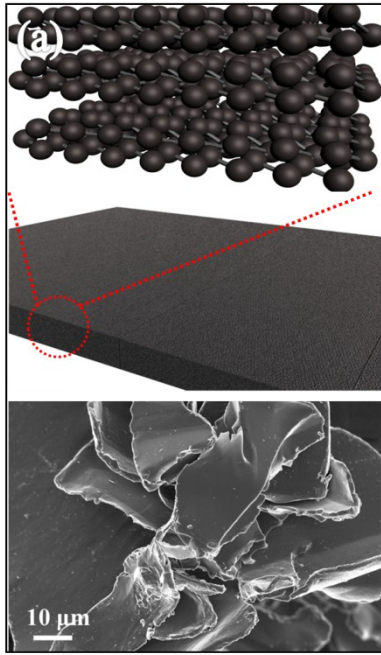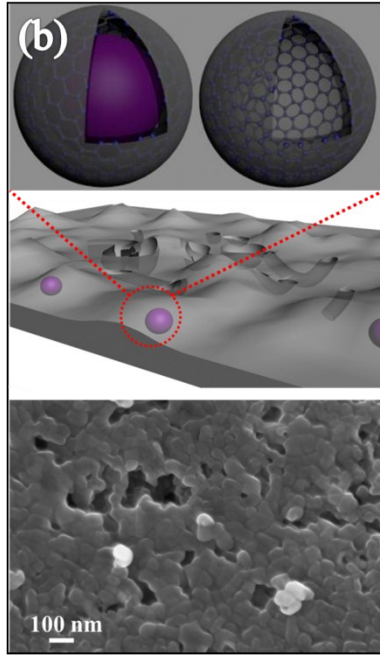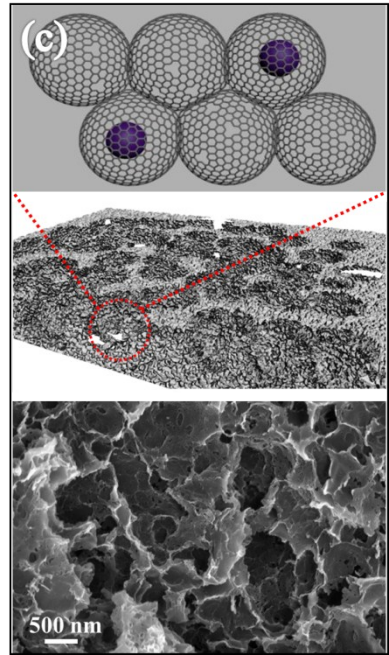

Figure S1

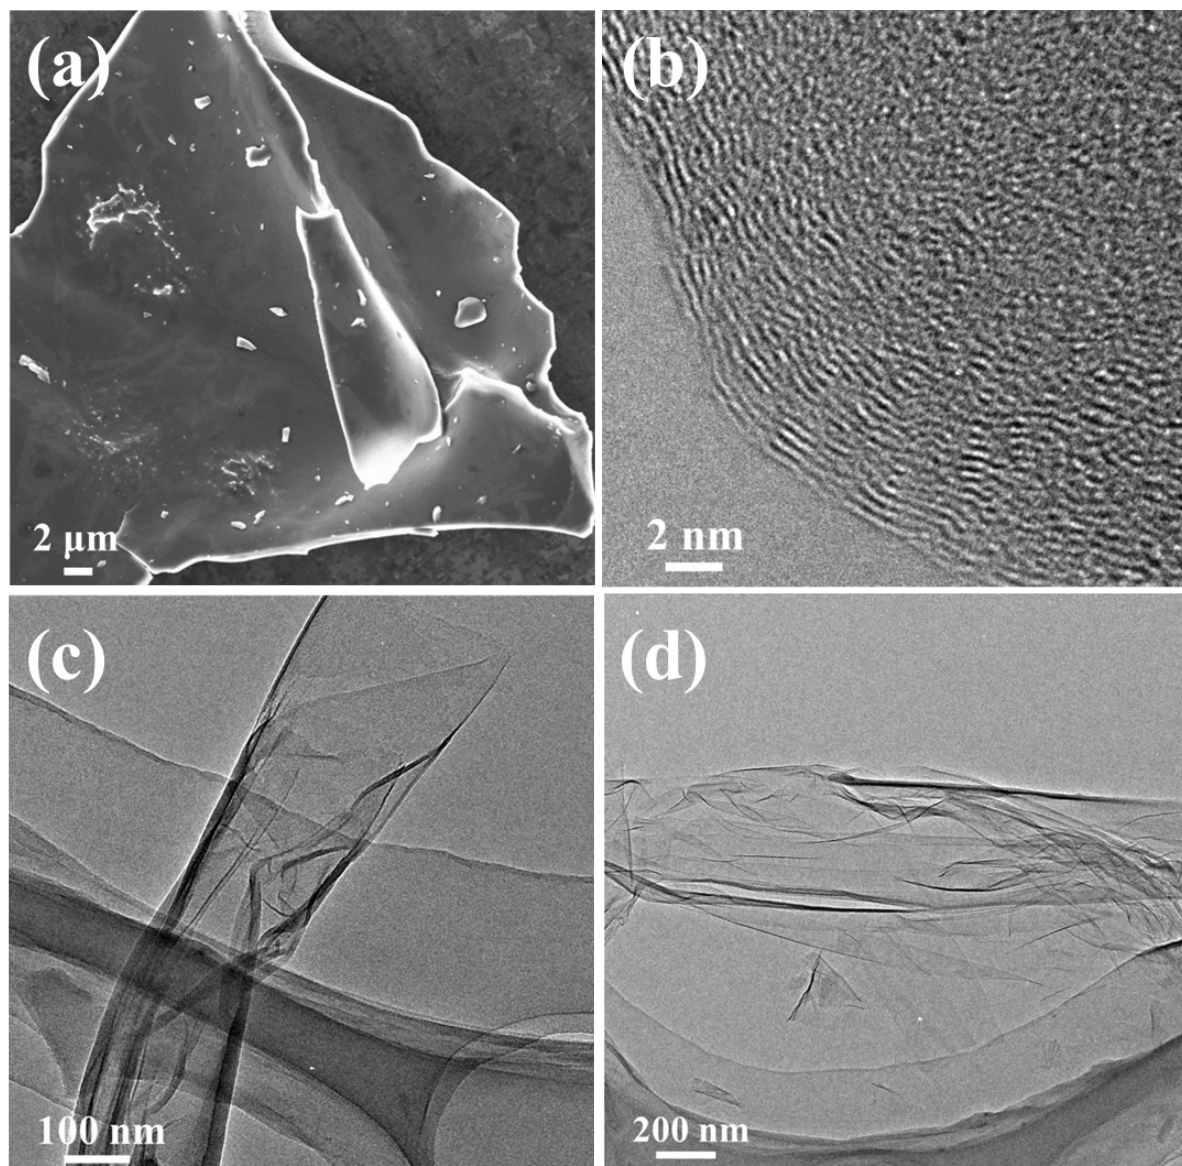

Figure S2

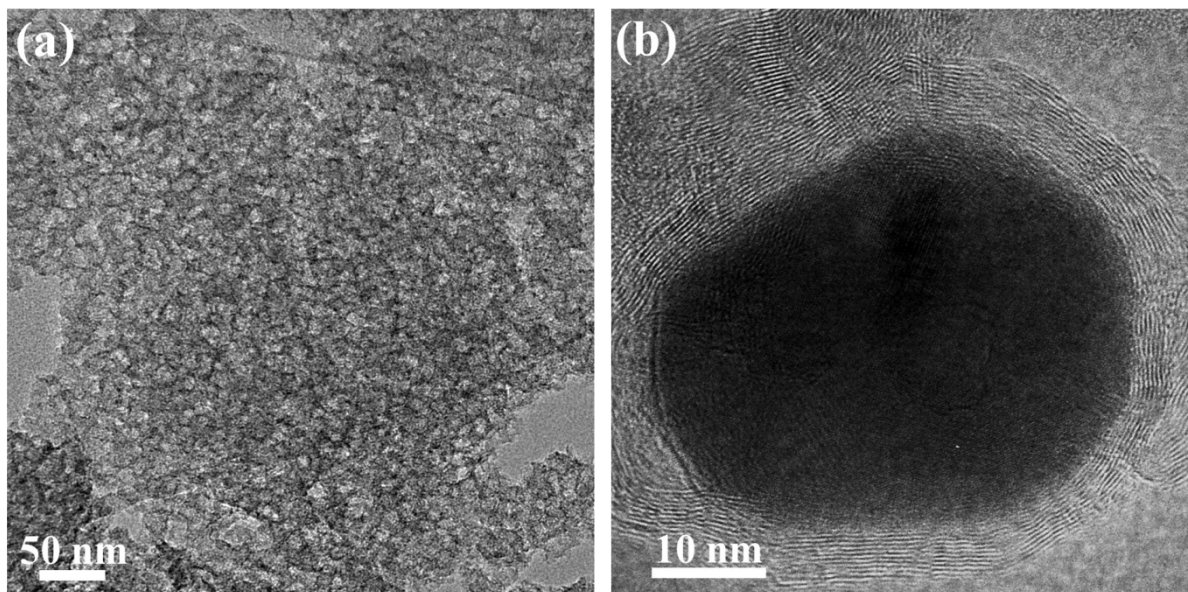

Figure S3

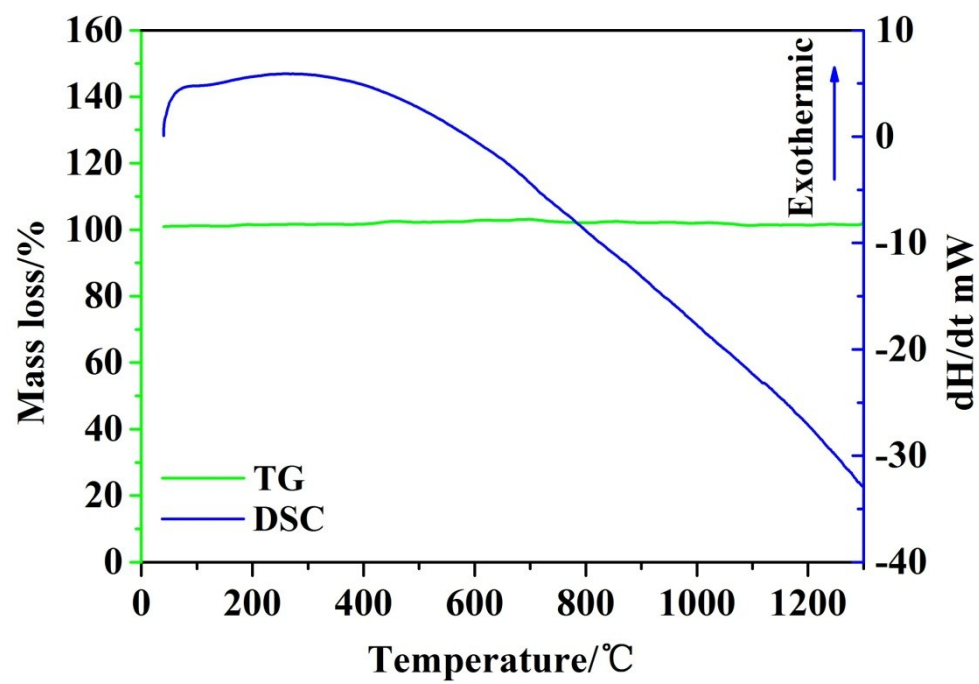

Figure S4

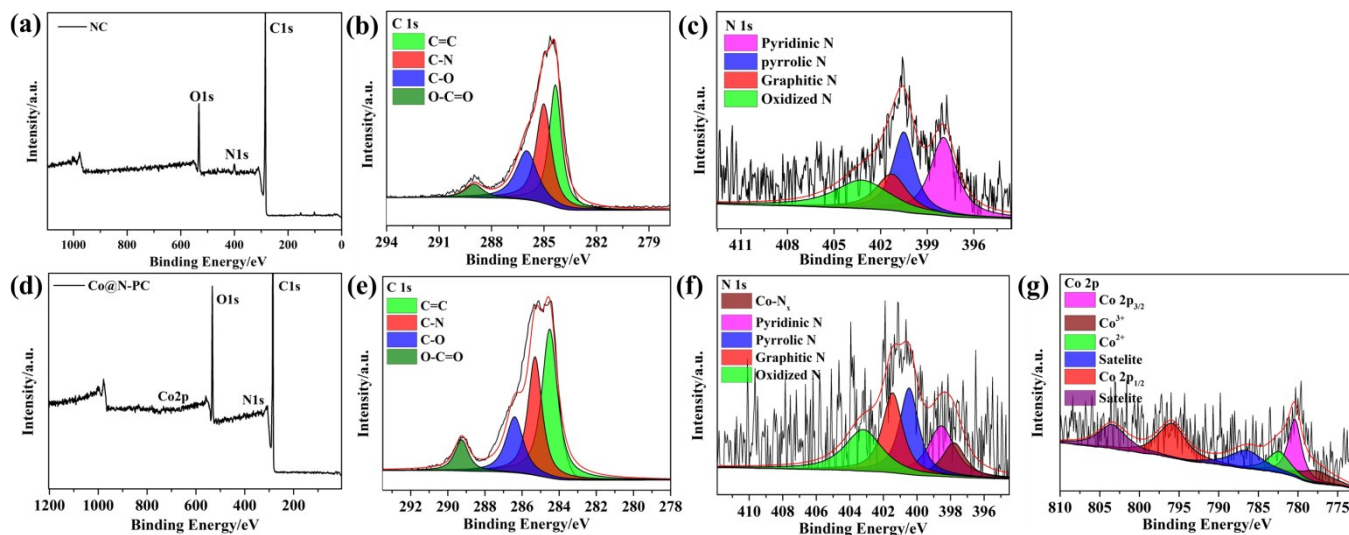

Figure S5

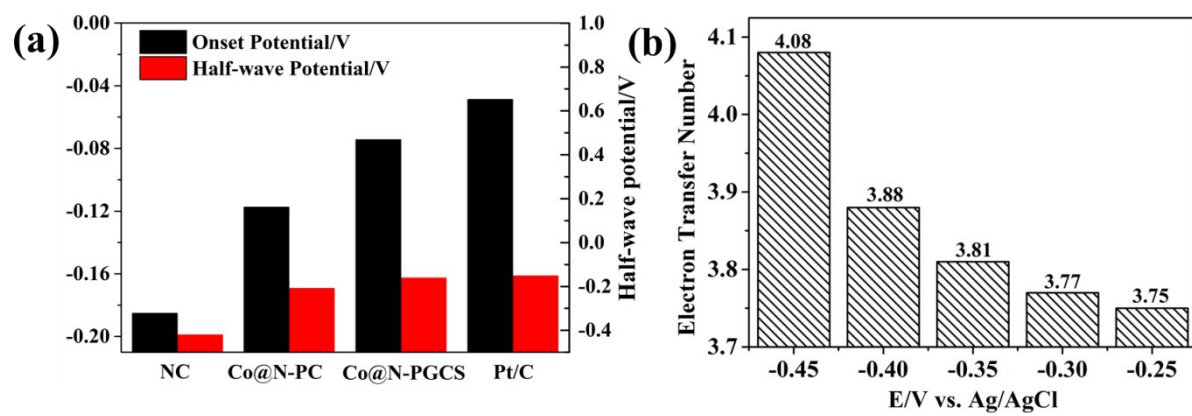



Figure S6

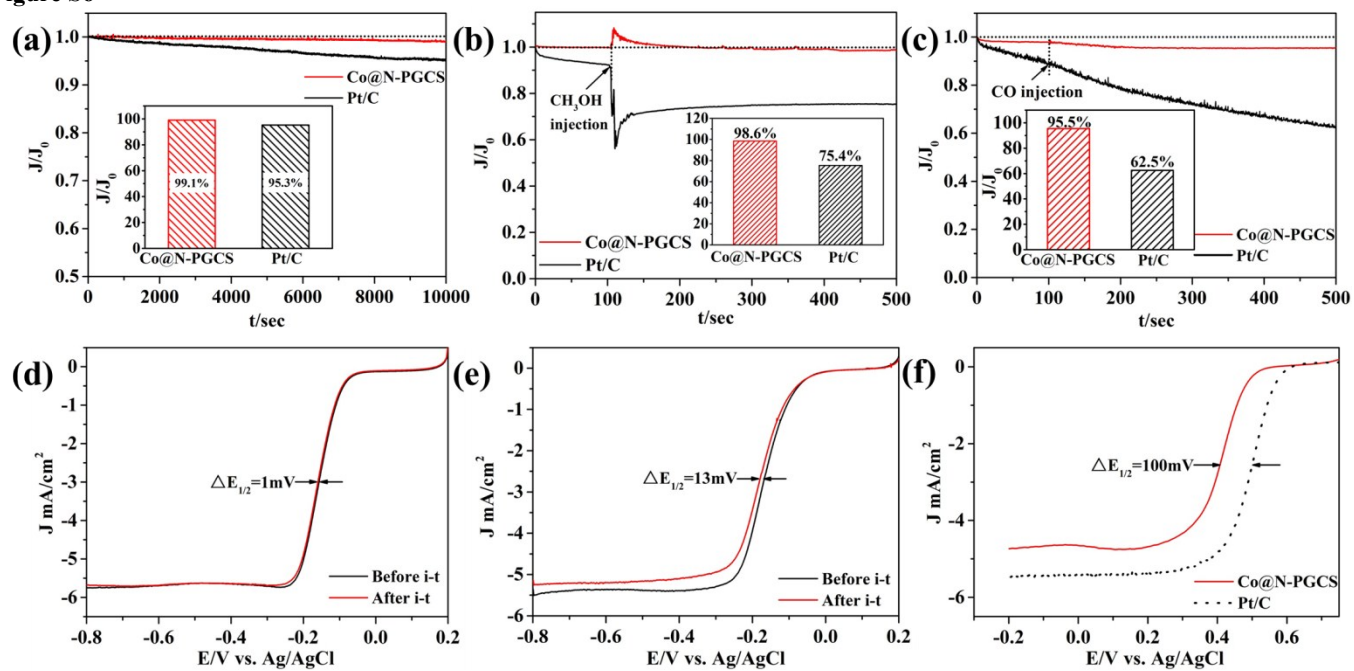

Figure S7

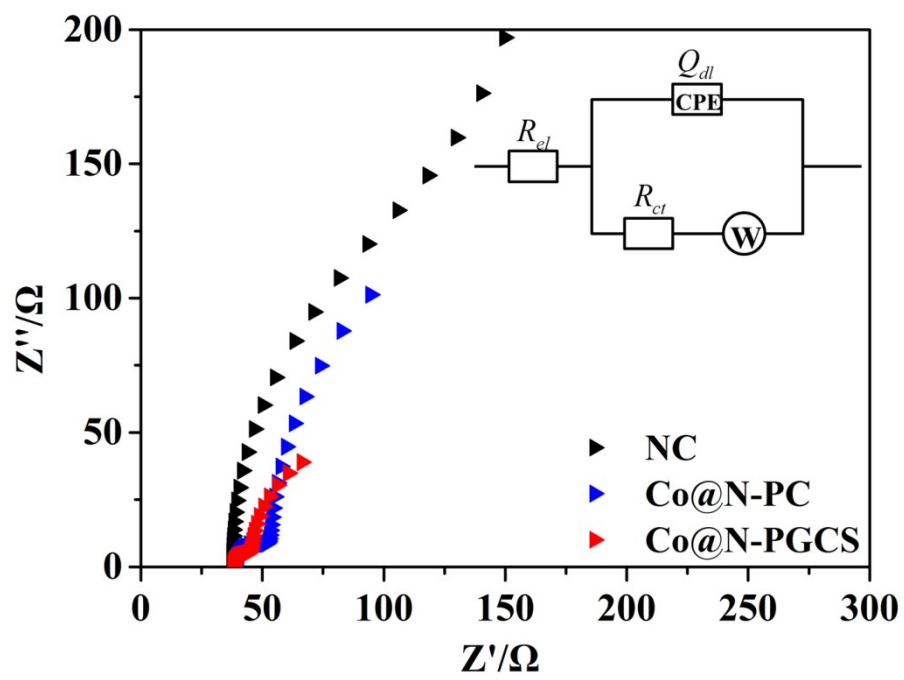

Figure S8

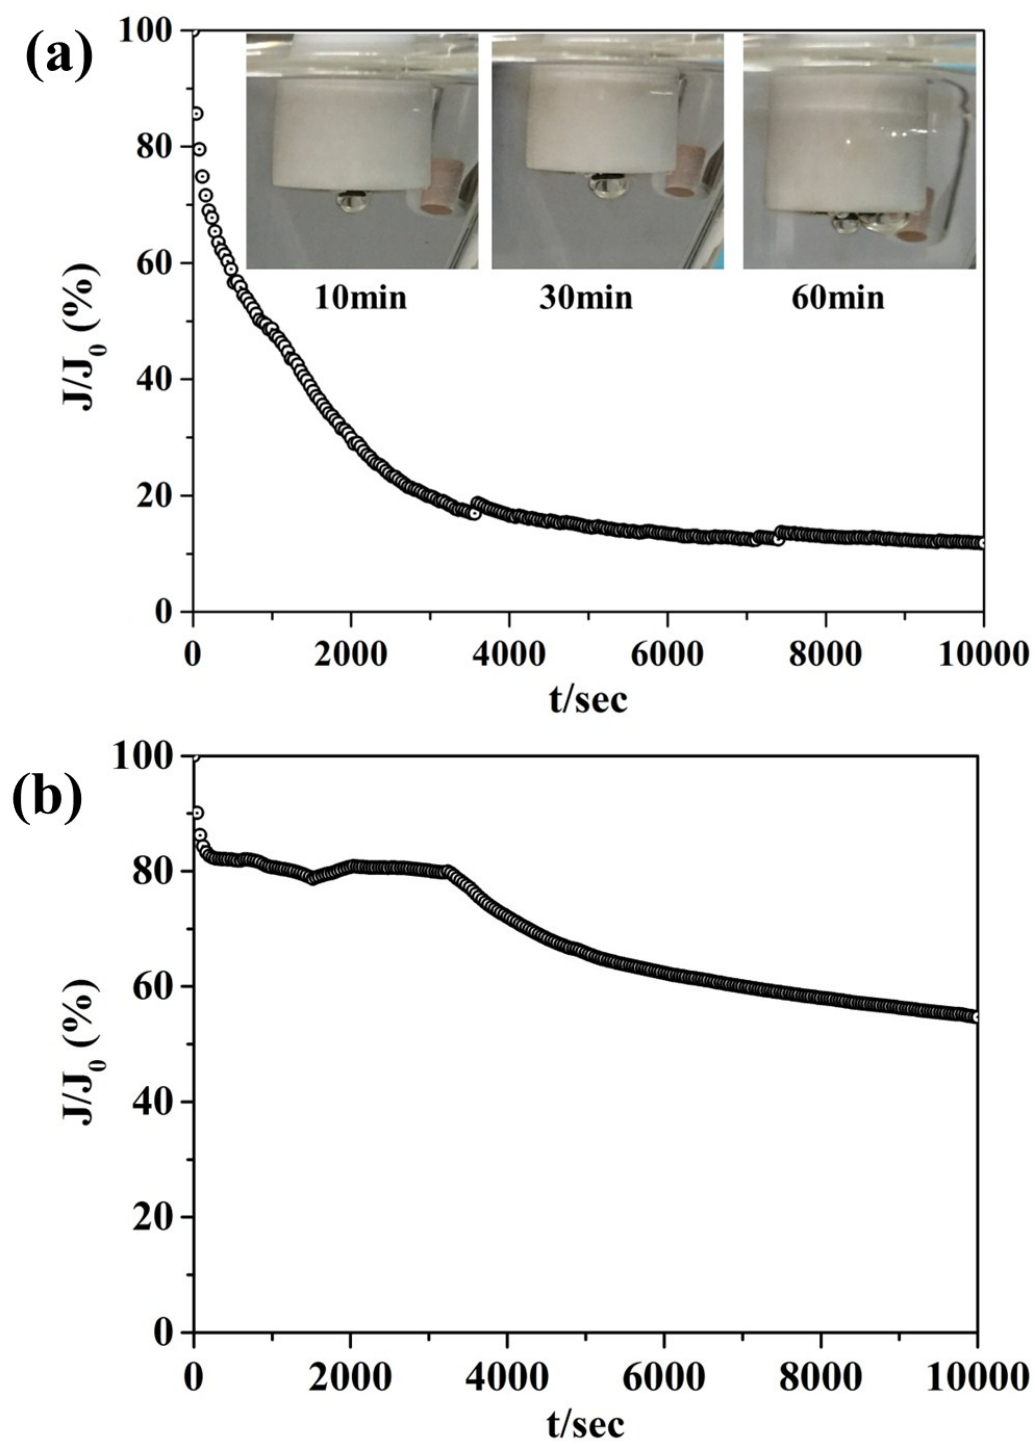

**Table S1**

| Element | XPS (at. %) |          |         | Element Mapping<br>(wt. %) |
|---------|-------------|----------|---------|----------------------------|
|         | NC          | Co@N-MPG | Co@N-PG | Co@N-MPG                   |
| C       | 84.75       | 94.12    | 86.29   | 87.72                      |
| O       | 12.61       | 3.69     | 13.56   | 6.37                       |
| N       | 2.65        | 2.13     | 0.05    | 2.67                       |
| Co      | –           | 0.06     | 0.1     | 3.23                       |

## Reference

1 Chen, Z., Higgins, D., Chen, Z. *Carbon*, 2010, **48**, 3057.
